# Supplementary material
Source: PubMed Central journal article supplement (PMC10564507)
Supplement: media-1.pdf [file media-1.pdf]

## Supplementary Note 1: HCP-YA data acquisition and preprocessing

**Data Acquisition** Whole-brain echo-planar imaging acquisitions were measured with a 32 channel head coil on a modified 3T Siemens Skyra (Connectome Skyra) at WashU with time to repetition (TR)=720ms, time to echo (TE)=33.1ms, flip angle=52, bandwidth=2,290 Hz/pixel, in-plane field of view (FOV)=208×180mm, 72 slices, and 2.0mm isotropic voxels, with a multi-band acceleration factor of 8 (Uğurbil et al., 2013). Data were collected over 2 days. On each day 29 min of rest (eyes open with fixation on a cross-hair) BOLD data across two runs were collected (56 min total), followed by 30 min of task fMRI data collection (60 min total). The two 14.5-minute resting-state BOLD runs that were collected on the same day were acquired with opposite phase encoding directions (L/R and R/L). Complete parameters and acquisition details for the HCP dataset were reported by (Smith et al., 2013). Task-based imaging data were not used in this study. Structural scans with the following parameters were also collected: T1-weighted (0.7 mm isotropic resolution, TR=2400ms, TE=2.14ms, flip angle=8, in-plane field of view=224×224) and T2-weighted (0.7 mm isotropic resolution, TR=3200ms, TE=565ms, variable flip angle, in-plane field of view=224×224).

**Preprocessing** Resting-State fMRI Preprocessing Preprocessing consisted of the following steps, which closely followed the steps advanced by the HCP consortium: i) The ‘minimal preprocessing’ approach outlined by Glasser and colleagues (Glasser et al., 2013), which involved intensity normalization, phase-encoding direction unwarping, motion correction, and spatial normalization to a standard template (Glasser et al., 2016) MSMAll, Angular Deviation Penalty (ADP) version; (Glasser et al., 2016); ii) High-pass filtering (0.009Hz); iii) ICA-FIX for artifact removal (Salimi-Khorshidi et al., 2014). The final ‘minimally preprocessed’ BOLD data was represented in the Connectivity Informatics Technology Initiative (CIFTI) file format, which combines surface-based data representation for 1 cortex and volume-based data for subcortex gray matter locations (i.e. ‘grayordinates’). The CIFTI grayordinate BOLD time series were in turn used for subsequent analysis. Additional analyses were performed with Workbench v1.2.3 and Matlab 2014b (The Mathworks). To remove any potential artifact at the onset/offset of each new run, the first 100 frames were removed from every BOLD run for each subject. Subsequently, BOLD runs were concatenated in order of acquisition (resting-state fMRI runs 2-1-4-3, R/L first, then L/R) following removal of the mean of each run from each time series.

**Visualization** All visualizations were produced using Connectome Workbench using the CIFTI format, which combines surface data for cortex with volume data for subcortex. To convert a 360-element partition vector (cortex) into a CIFTI file, the following steps were taken: 1. For each hemisphere, a template 32k vertex CIFTI surface map file was loaded, where each vertex was labeled with its corresponding parcel label from the Glasser parcels. 2. Each parcel label was replaced with its corresponding network label from the 360element partition vector. 3. Step 2 was repeated for the opposite hemisphere. 4. Results were saved as a func.gii file for visualization in Connectome Workbench.

## Supplementary Figures

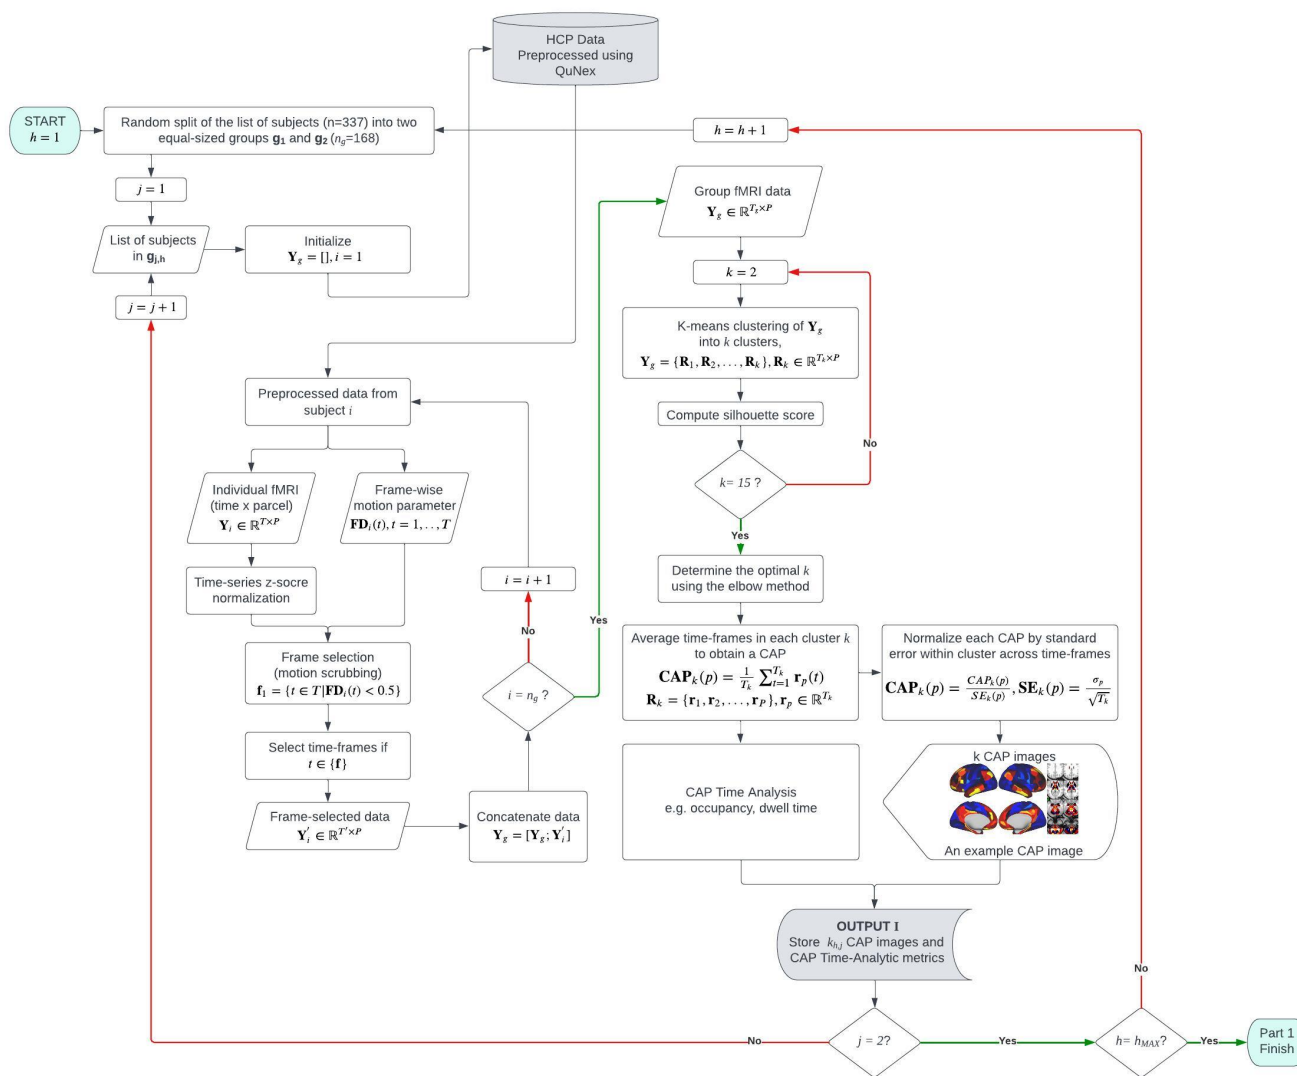

Fig. S1. Workflow of CAP analysis.

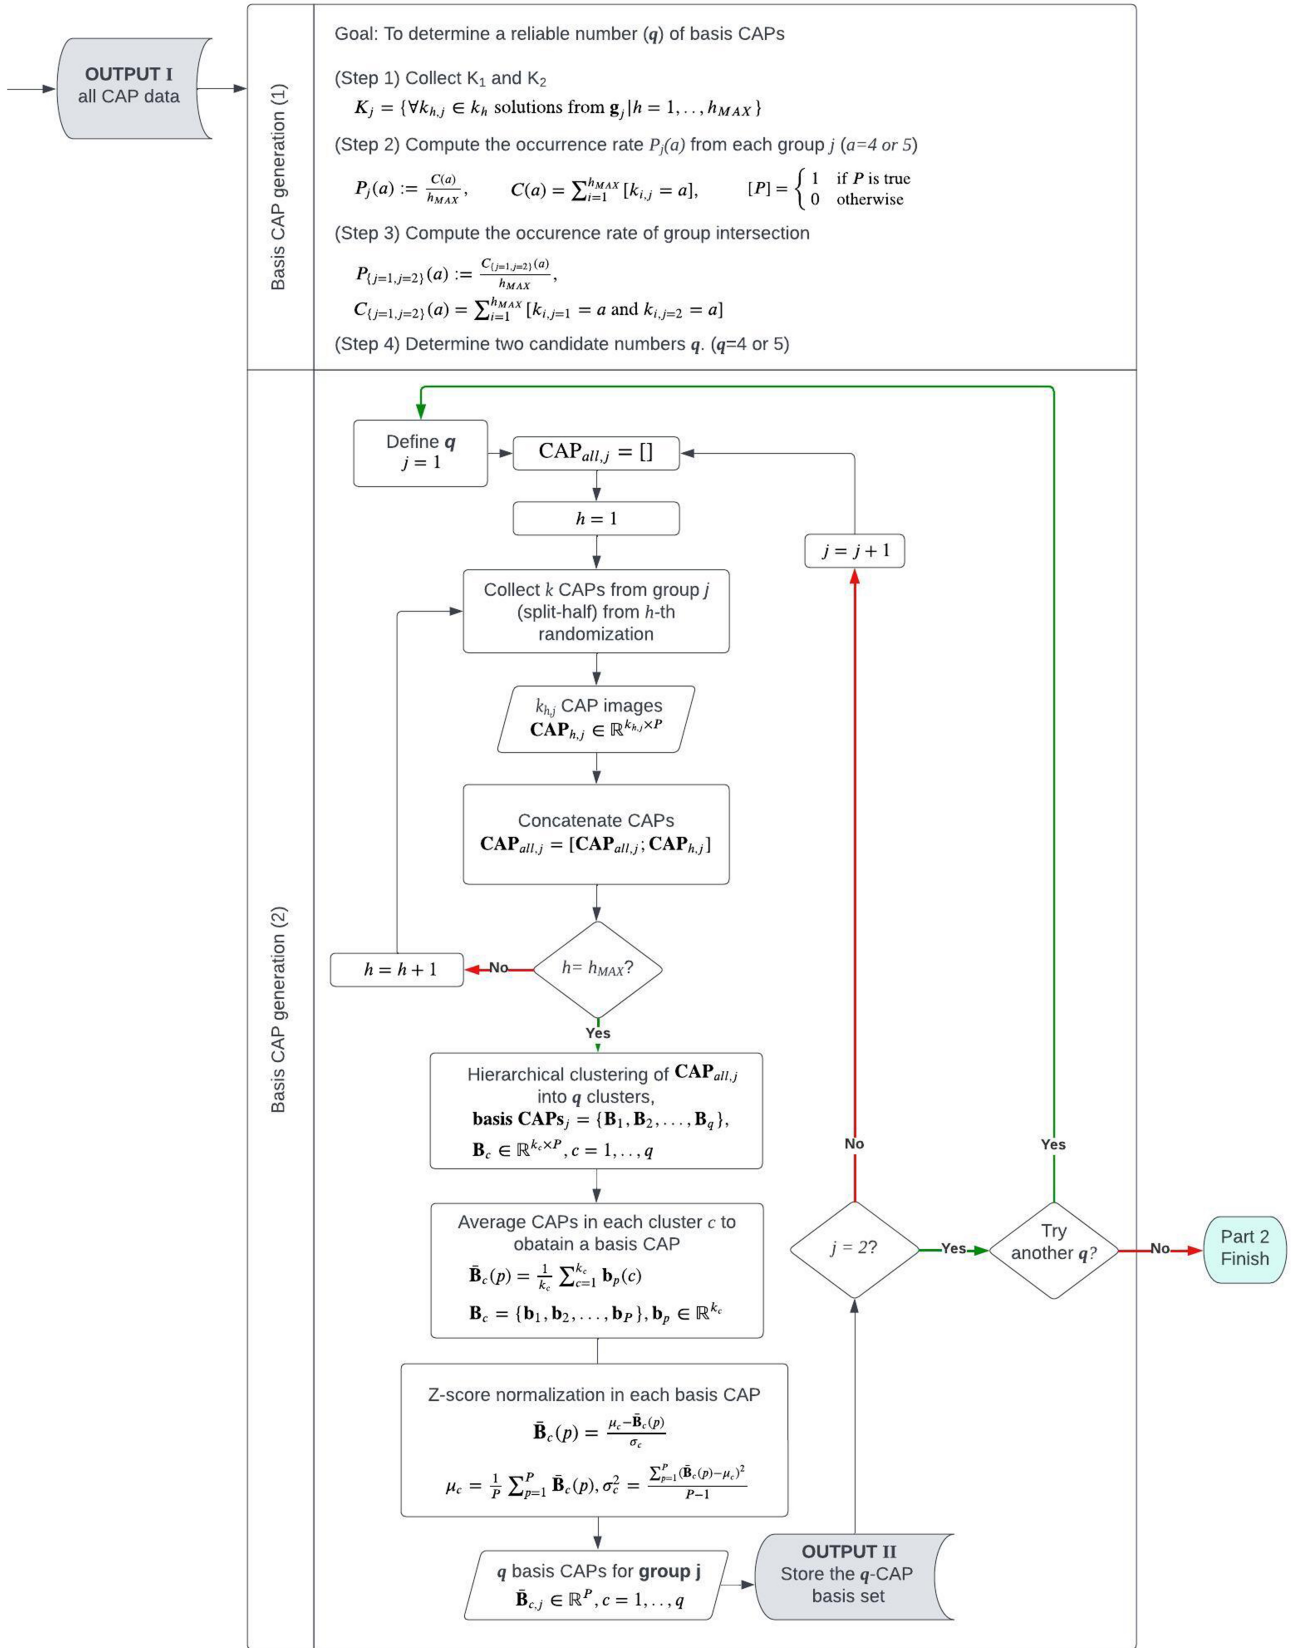

Fig. S2. Generation of basis CAP sets.

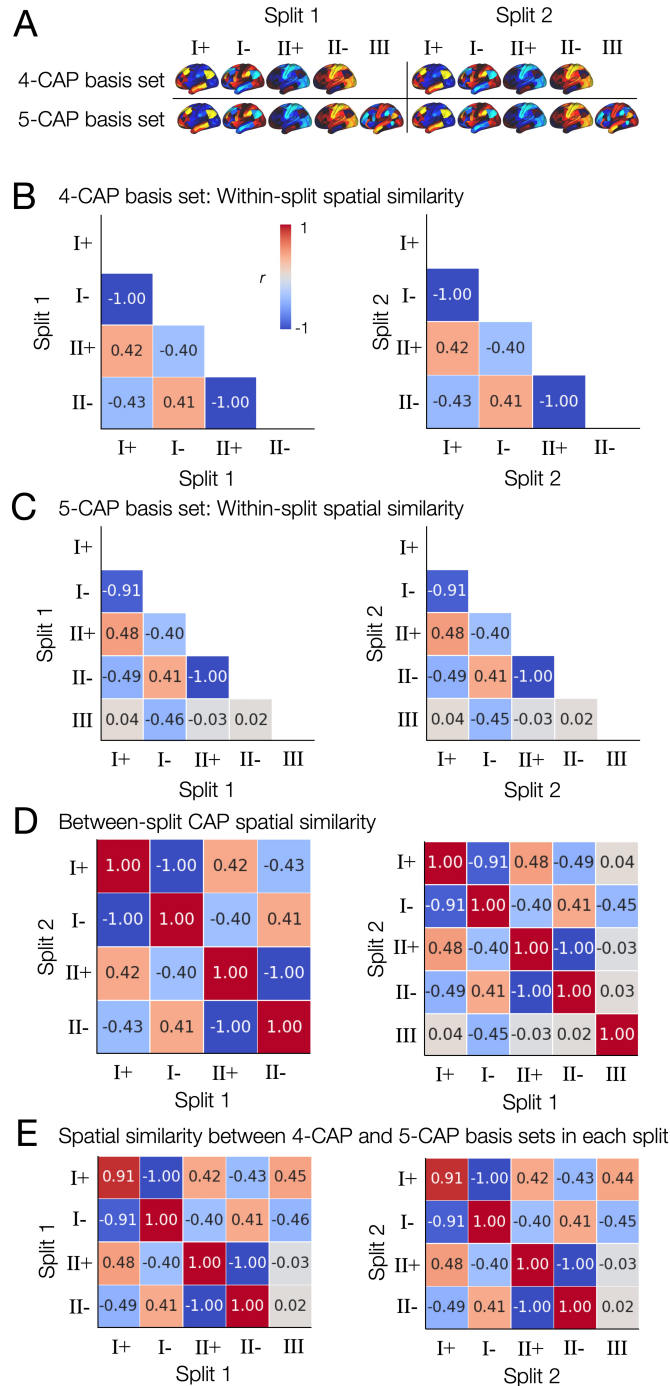

**Fig. S3. Spatial patterns of the basis CAPs are distinct to each other and reproducible using the proposed shuffled split-half analysis.** (A) Spatial patterns of the basis CAPs in each split-half data. The 4-CAP basis set and the 5-CAP basis set were generated independently from the same split-half data, using the hierarchical clustering across 1,000 shuffled split-half resampling, as described in Fig. S2. (B) Spatial similarity ( $r$ , correlation coefficient) of the 4-CAP basis set within the split 1 data (left) and within the split 2 data (right).  $r$  values were rounded to the nearest 2 decimal digits for visualization. (C) Spatial similarity of the 5-CAP basis set within the split 1 data (left) and within the split 2 data (right). (D) Spatial similarity of the 4-CAP basis set between the split 1 and 2 data (left) and of the 5-CAP basis set between the split 1 and 2 data (right). (E) Spatial similarity between the 4-CAP basis set and the 5-CAP basis set within the split 1 data (left) and within the split 2 data (right).

**A** 4 Basis CAPs vs 4 Estimated CAPs

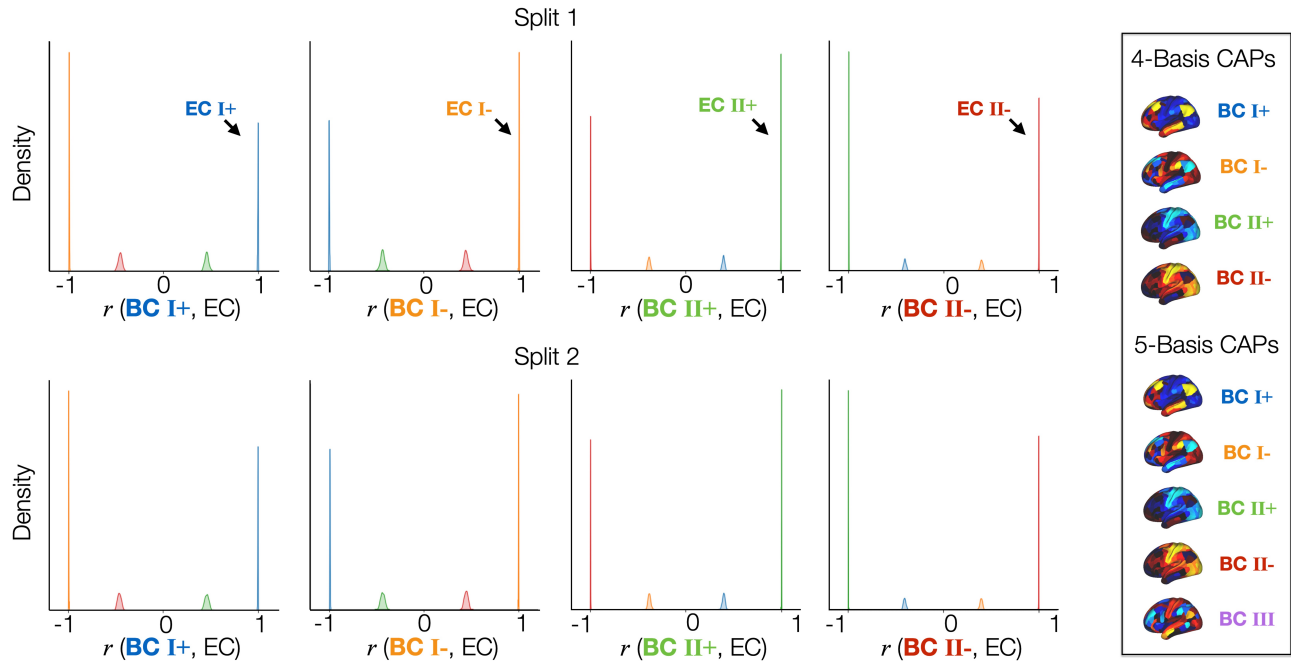

**B** 5 Basis CAPs vs 5 Estimated CAPs

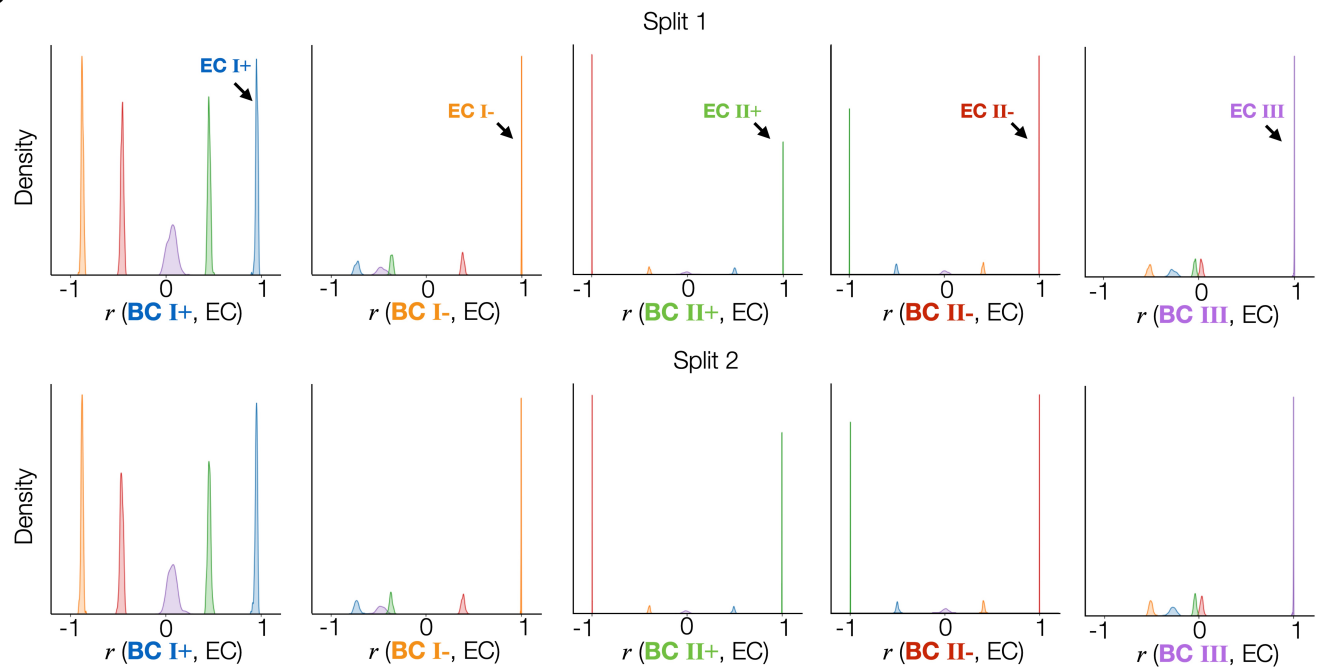

**Fig. S4. Spatial patterns of the CAPs estimated from both splits are reproducible and strongly correlated with at least one of the basis CAPs. (A)** From left to right, the marginal distributions of  $r$  between all estimated CAPs (ECs) and each basis CAP (BC) from the 4-CAP basis set are illustrated using kernel density estimation. Results were obtained from the split 1 data (top) and the split 2 data (bottom). Each  $r$  value is color-coded using a sorting algorithm to label the corresponding EC using the maximum spatial correlation with BCs. **(B)** From left to right, the marginal distributions of  $r$  between all estimated CAPs and each BC from the 5-CAP basis set are illustrated using kernel density estimation.

**A** 5 Basis CAPs vs 4 Estimated CAPs

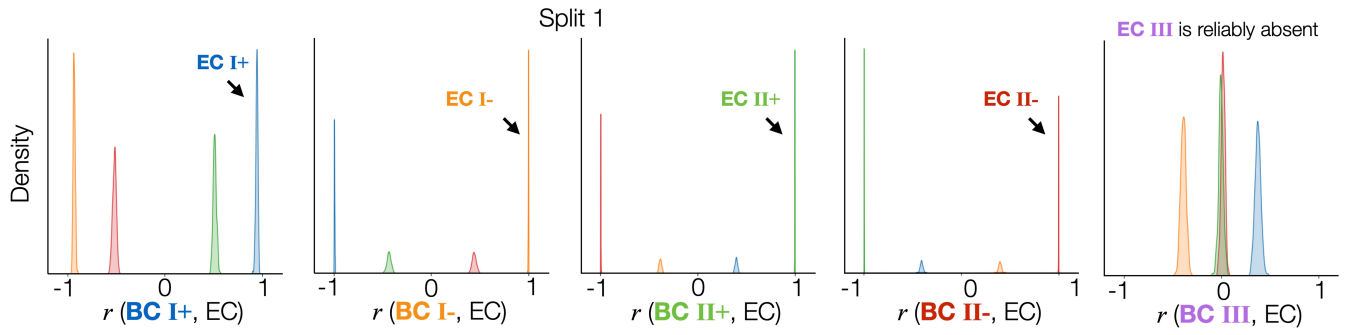

**B** 5 Basis CAPs vs 4 Estimated CAPs

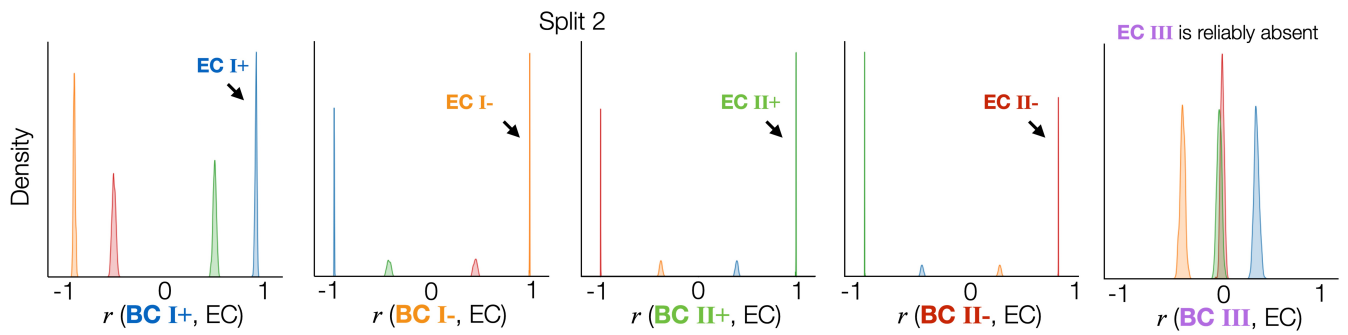

**Fig. S5. CAP state III is reproducibly absent across permutations in both splits.**

DRAFT

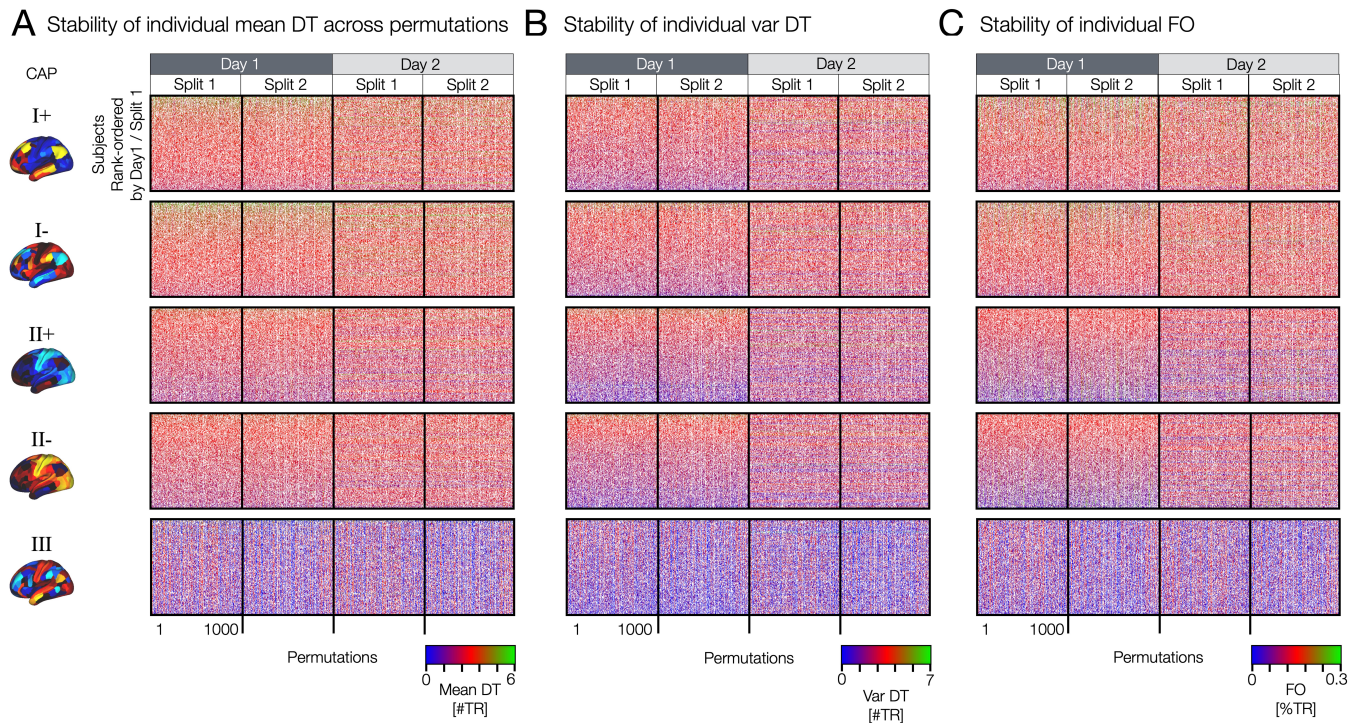

**Fig. S6. Stability of individual mean DT, var DT and FO across permutations**

DRAFT

Between-day reliability at single subject level

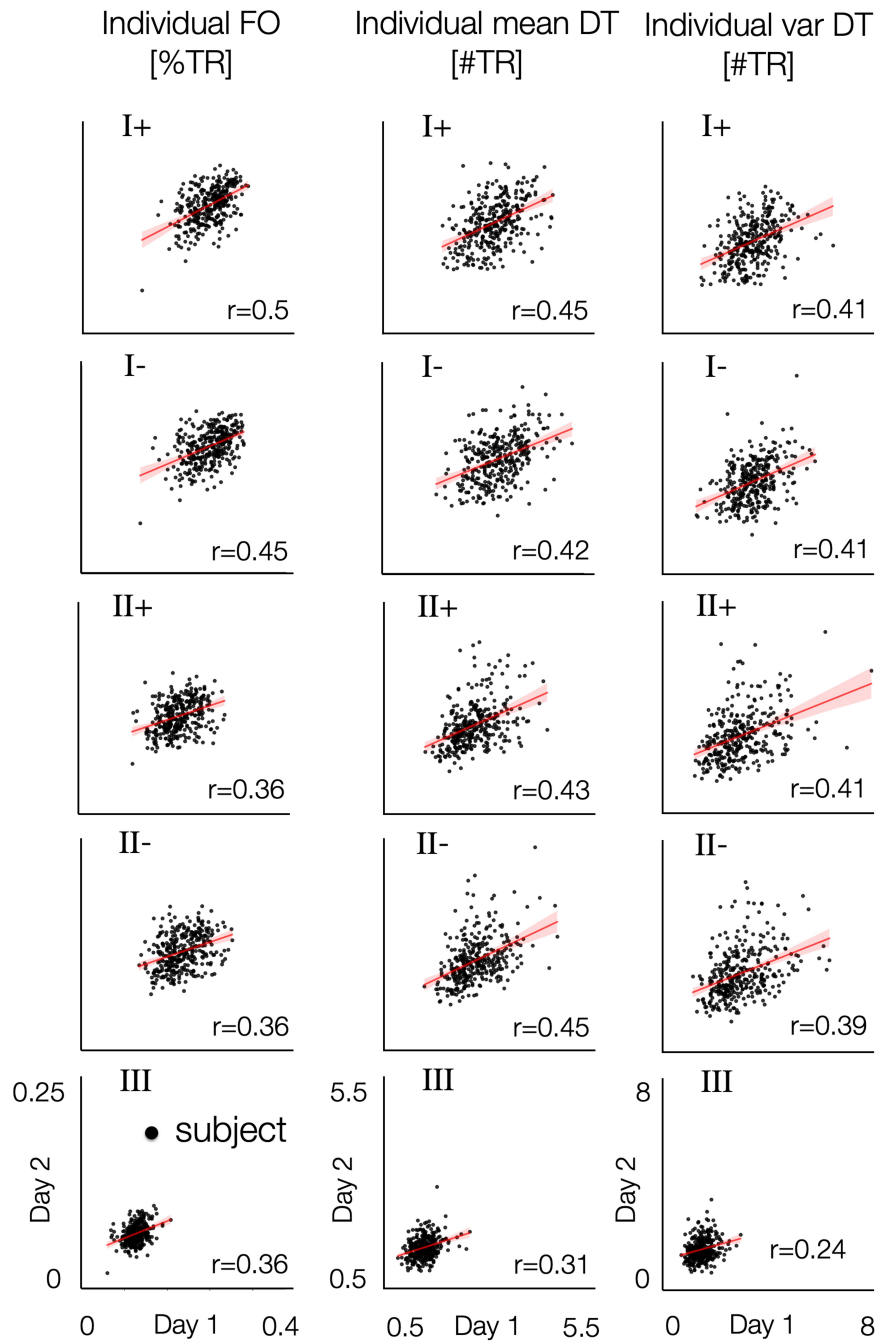

**Fig. S7. Between-day reliability of neural measures at single subject level. Each datapoint in the scatter plot is a subject. For each subject, neural measures were averaged across permutations.**



Similar state-trait features between positive and negative co-activations

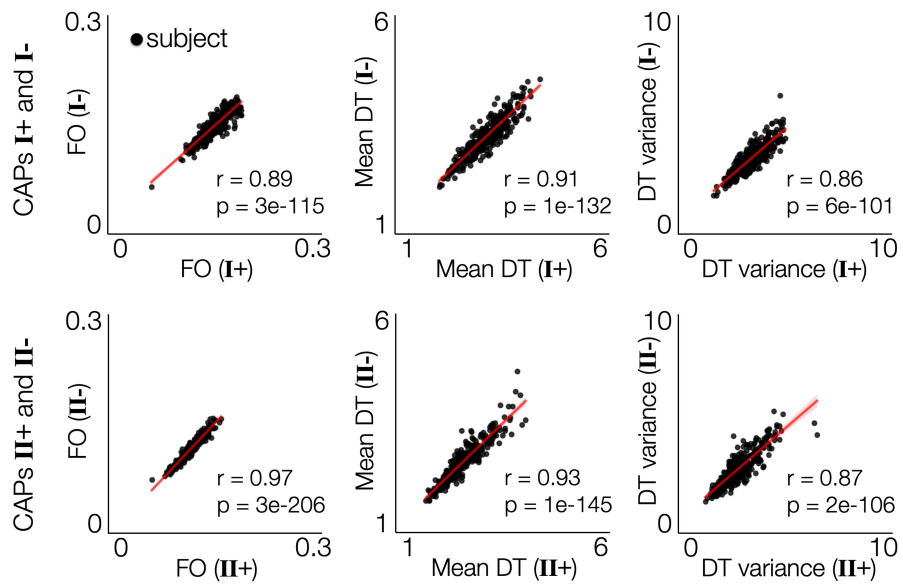

**Fig. S8. Similarity of temporal organizations between positive and negative co-activation patterns.** CAP states I and II have similar FO, mean DT and DT variance across the positive and negative co-activation states (I+ vs I- and II+ vs II-). Each data-point indicate a subject. The temporal metric values across all permutations and two days were averaged within each subject.

### Within-subject CAP variance

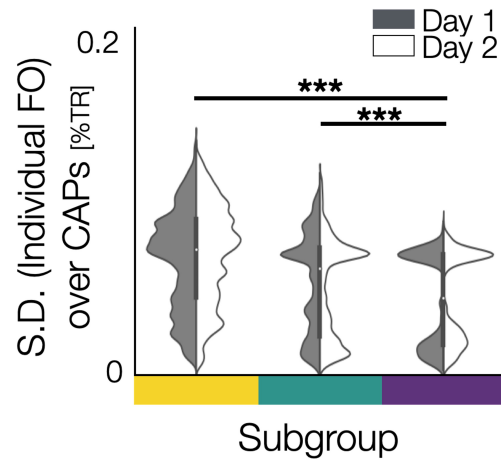

Fig. S9. Within-subject variance of FO across 5 CAPs across permutations.

DRAFT

|                                             |                                               |                                          |
|---------------------------------------------|-----------------------------------------------|------------------------------------------|
| 1 - MMSE_Score                              | 91 - Language_Task_Story_Avg_Difficulty_Level | 181 - DSM_Somp_T                         |
| 2 - PSQI_Score                              | 92 - Language_Task_Math_Acc                   | 182 - DSM_Avoid_T                        |
| 3 - PicSeq_AgeAdj                           | 93 - Language_Task_Math_Median_RT             | 183 - DSM_Adh_T                          |
| 4 - CardSort_AgeAdj                         | 94 - Language_Task_Math_Avg_Difficulty_Level  | 184 - DSM_Antis_T                        |
| 5 - Flanker_AgeAdj                          | 95 - Relational_Task_Acc                      | 185 - SSAGA_ChildhoodConduct             |
| 6 - PMAT24_A_CR                             | 96 - Relational_Task_Median_RT                | 186 - SSAGA_PanicDisorder                |
| 7 - PMAT24_A_SI                             | 97 - Relational_Task_Match_Acc                | 187 - SSAGA_Agoraphobia                  |
| 8 - PMAT24_A_RTCT                           | 98 - Relational_Task_Match_Median_RT          | 188 - SSAGA_Depressive_Ep                |
| 9 - ReadEng_AgeAdj                          | 99 - Relational_Task_Rel_Acc                  | 189 - SSAGA_Depressive_Sx                |
| 10 - PicVocab_AgeAdj                        | 100 - Relational_Task_Rel_Median_RT           | 190 - Total_Drinks_7days                 |
| 11 - ProcSpeed_AgeAdj                       | 101 - Social_Task_Perc_Random                 | 191 - Num_Days_Drank_7days               |
| 12 - DDisc_SV_1mo_200                       | 102 - Social_Task_Perc_TOM                    | 192 - Avg_Weekday_Drinks_7days           |
| 13 - DDisc_SV_6mo_200                       | 103 - Social_Task_Perc_Unsure                 | 193 - Avg_Weekend_Drinks_7days           |
| 14 - Ddisc_SV_1yr_200                       | 104 - Social_Task_Median_RT_Random            | 194 - Total_Beer_Wine_Cooler_7days       |
| 15 - DDisc_SV_3yr_200                       | 105 - Social_Task_Median_RT_TOM               | 195 - Avg_Weekday_Beer_Wine_Cooler_7days |
| 16 - DDisc_SV_5yr_200                       | 106 - Social_Task_Median_RT_Unsure            | 196 - Avg_Weekend_Beer_Wine_Cooler_7days |
| 17 - DDisc_SV_10yr_200                      | 107 - Social_Task_Random_Perc_Random          | 197 - Total_Malt_Liquor_7days            |
| 18 - DDisc_SV_1mo_40K                       | 108 - Social_Task_Random_Median_RT_Random     | 198 - Avg_Weekday_Malt_Liquor_7days      |
| 19 - DDisc_SV_6mo_40K                       | 109 - Social_Task_Random_Perc_TOM             | 199 - Avg_Weekend_Malt_Liquor_7days      |
| 20 - DDisc_SV_1yr_40K                       | 110 - Social_Task_Random_Perc_Unsure          | 200 - Total_Wine_7days                   |
| 21 - DDisc_SV_3yr_40K                       | 111 - Social_Task_TOM_Perc_TOM                | 201 - Avg_Weekday_Wine_7days             |
| 22 - DDisc_SV_5yr_40K                       | 112 - Social_Task_TOM_Median_RT_TOM           | 202 - Avg_Weekend_Wine_7days             |
| 23 - DDisc_SV_10yr_40K                      | 113 - Social_Task_TOM_Perc_Unsure             | 203 - Total_Hard_Liquor_7days            |
| 24 - DDisc_AUC_200                          | 114 - WM_Task_Acc                             | 204 - Avg_Weekday_Hard_Liquor_7days      |
| 25 - DDisc_AUC_40K                          | 115 - WM_Task_Median_RT                       | 205 - Avg_Weekend_Hard_Liquor_7days      |
| 26 - VSPLOT_TC                              | 116 - WM_Task_2bk_Acc                         | 206 - Total_Other_Alc_7days              |
| 27 - VSPLOT_CRTE                            | 117 - WM_Task_2bk_Median_RT                   | 207 - Avg_Weekend_Other_Alc_7days        |
| 28 - VSPLOT_OFF                             | 118 - WM_Task_Obk_Acc                         | 208 - SSAGA_Alc_D4_Dp_Sx                 |
| 29 - SCPT_TP                                | 119 - WM_Task_Obk_Median_RT                   | 209 - SSAGA_Alc_D4_Ab_Dx                 |
| 30 - SCPT_TN                                | 120 - WM_Task_Obk_Body_Acc                    | 210 - SSAGA_Alc_D4_Ab_Sx                 |
| 31 - SCPT_FP                                | 121 - WM_Task_Obk_Body_Acc_Target             | 211 - SSAGA_Alc_D4_Dp_Dx                 |
| 32 - SCPT_FN                                | 122 - WM_Task_Obk_Body_Acc_Nontarget          | 212 - SSAGA_Alc_12_Drinks_Per_Day        |
| 33 - SCPT_TPRT                              | 123 - WM_Task_Obk_Face_Acc                    | 213 - SSAGA_Alc_12_Frq                   |
| 34 - SCPT_SEN                               | 124 - WM_Task_Obk_Face_Acc_Target             | 214 - SSAGA_Alc_12_Frq_5plus             |
| 35 - SCPT_SPEC                              | 125 - WM_Task_Obk_Face_ACC_Nontarget          | 215 - SSAGA_Alc_12_Frq_Drk               |
| 36 - SCPT_LRNR                              | 126 - WM_Task_Obk_Place_Acc                   | 216 - SSAGA_Alc_12_Max_Drinks            |
| 37 - IWRD_TOT                               | 127 - WM_Task_Obk_Place_Acc_Target            | 217 - SSAGA_Alc_Age_1st_Use              |
| 38 - IWRD_RTC                               | 128 - WM_Task_Obk_Place_Acc_Nontarget         | 218 - SSAGA_Alc_Hvy_Drinks_Per_Day       |
| 39 - ListSort_AgeAdj                        | 129 - WM_Task_Obk_Tool_Acc                    | 219 - SSAGA_Alc_Hvy_Frq                  |
| 40 - ER40_CR                                | 130 - WM_Task_Obk_Tool_Acc_Target             | 220 - SSAGA_Alc_Hvy_Frq_5plus            |
| 41 - ER40_CRT                               | 131 - WM_Task_Obk_Tool_Acc_Nontarget          | 221 - SSAGA_Alc_Hvy_Frq_Drk              |
| 42 - ER40ANG                                | 132 - WM_Task_2bk_Body_Acc                    | 222 - SSAGA_Alc_Hvy_Max_Drinks           |
| 43 - ER40FEAR                               | 133 - WM_Task_2bk_Body_Acc_Target             | 223 - Total_Any_Tobacco_7days            |
| 44 - ER40HAP                                | 134 - WM_Task_2bk_Body_Acc_Nontarget          | 224 - Times_Used_Any_Tobacco_Today       |
| 45 - ER40NOE                                | 135 - WM_Task_2bk_Face_Acc                    | 225 - Num_Days_Used_Any_Tobacco_7days    |
| 46 - ER40SAD                                | 136 - WM_Task_2bk_Face_Acc_Target             | 226 - Avg_Weekday_Any_Tobacco_7days      |
| 47 - AngAffect_Unadj                        | 137 - WM_Task_2bk_Face_Acc_Nontarget          | 227 - Avg_Weekend_Any_Tobacco_7days      |
| 48 - AngHostil_Unadj                        | 138 - WM_Task_2bk_Place_Acc                   | 228 - Total_Cigarettes_7days             |
| 49 - AngAggr_Unadj                          | 139 - WM_Task_2bk_Place_Acc_Target            | 229 - Avg_Weekday_Cigarettes_7days       |
| 50 - FearAffect_Unadj                       | 140 - WM_Task_2bk_Place_Acc_Nontarget         | 230 - Avg_Weekend_Cigarettes_7days       |
| 51 - FearSomat_Unadj                        | 141 - WM_Task_2bk_Tool_Acc                    | 231 - Total_Cigars_7days                 |
| 52 - Sadness_Unadj                          | 142 - WM_Task_2bk_Tool_Acc_Target             | 232 - Avg_Weekday_Cigars_7days           |
| 53 - LifeSatisf_Unadj                       | 143 - WM_Task_2bk_Tool_Acc_Nontarget          | 233 - Avg_Weekend_Cigars_7days           |
| 54 - MeanPurp_Unadj                         | 144 - WM_Task_Obk_Body_Median_RT              | 234 - Total_Cheew_7days                  |
| 55 - PosAffect_Unadj                        | 145 - WM_Task_Obk_Body_Median_RT_Target       | 235 - Avg_Weekday_Cheew_7days            |
| 56 - Friendship_Unadj                       | 146 - WM_Task_Obk_Body_Median_RT_Nontarget    | 236 - Avg_Weekend_Cheew_7days            |
| 57 - Loneliness_Unadj                       | 147 - WM_Task_Obk_Face_Median_RT              | 237 - Total_Other_Tobacco_7days          |
| 58 - PercHostil_Unadj                       | 148 - WM_Task_Obk_Face_Median_RT_Target       | 238 - Avg_Weekday_Other_Tobacco_7days    |
| 59 - PercReject_Unadj                       | 149 - WM_Task_Obk_Face_Median_RT_Nontarget    | 239 - Avg_Weekend_Other_Tobacco_7days    |
| 60 - EmotSupp_Unadj                         | 150 - WM_Task_Obk_Place_Median_RT             | 240 - SSAGA_FTND_Score                   |
| 61 - InstruSupp_Unadj                       | 151 - WM_Task_Obk_Place_Median_RT_Target      | 241 - SSAGA_HSI_Score                    |
| 62 - PercStress_Unadj                       | 152 - WM_Task_Obk_Place_Median_RT_Nontarget   | 242 - SSAGA_TB_Age_1st_Cig               |
| 63 - SelfEff_Unadj                          | 153 - WM_Task_Obk_Tool_Median_RT              | 243 - SSAGA_TB_DSM_Difficulty_Quitting   |
| 64 - NEOFAC_A                               | 154 - WM_Task_Obk_Tool_Median_RT_Target       | 244 - SSAGA_TB_DSM_Tolerance             |
| 65 - NEOFAC_O                               | 155 - WM_Task_Obk_Tool_Median_RT_Nontarget    | 245 - SSAGA_TB_DSM_Withdrawal            |
| 66 - NEOFAC_C                               | 156 - WM_Task_2bk_Body_Median_RT              | 246 - SSAGA_TB_Hvy_CPD                   |
| 67 - NEOFAC_N                               | 157 - WM_Task_2bk_Body_Median_RT_Target       | 247 - SSAGA_TB_Max_Cigs                  |
| 68 - NEOFAC_E                               | 158 - WM_Task_2bk_Body_Median_RT_Nontarget    | 248 - SSAGA_TB_Reg_CPD                   |
| 69 - Emotion_Task_Acc                       | 159 - WM_Task_2bk_Face_Median_RT              | 249 - SSAGA_TB_Smoking_History           |
| 70 - Emotion_Task_Median_RT                 | 160 - WM_Task_2bk_Face_Median_RT_Target       | 250 - SSAGA_TB_Still_Smoking             |
| 71 - Emotion_Task_Face_Acc                  | 161 - WM_Task_2bk_Face_Median_RT_Nontarget    | 251 - SSAGA_TB_Yrs_Since_Quit            |
| 72 - Emotion_Task_Face_Median_RT            | 162 - WM_Task_2bk_Place_Median_RT             | 252 - SSAGA_TB_Yrs_Smoked                |
| 73 - Emotion_Task_Shape_Acc                 | 163 - WM_Task_2bk_Place_Median_RT_Target      | 253 - SSAGA_Times_Used_Illicits          |
| 74 - Emotion_Task_Shape_Median_RT           | 164 - WM_Task_2bk_Place_Median_RT_Nontarget   | 254 - SSAGA_Times_Used_Cocaine           |
| 75 - Gambling_Task_Perc_Larger              | 165 - WM_Task_2bk_Tool_Median_RT              | 255 - SSAGA_Times_Used_Hallucinogens     |
| 76 - Gambling_Task_Perc_Smaller             | 166 - WM_Task_2bk_Tool_Median_RT_Target       | 256 - SSAGA_Times_Used_Opiates           |
| 77 - Gambling_Task_Median_RT_Larger         | 167 - WM_Task_2bk_Tool_Median_RT_Nontarget    | 257 - SSAGA_Times_Used_Sedatives         |
| 78 - Gambling_Task_Median_RT_Smaller        | 168 - ASR_Anxd_Pct                            | 258 - SSAGA_Times_Used_Stimulants        |
| 79 - Gambling_Task_Reward_Perc_Larger       | 169 - ASR_Witd_T                              | 259 - SSAGA_Mj_Use                       |
| 80 - Gambling_Task_Reward_Median_RT_Larger  | 170 - ASR_Soma_T                              | 260 - SSAGA_Mj_Ab_Dep                    |
| 81 - Gambling_Task_Reward_Perc_Smaller      | 171 - ASR_Thot_T                              | 261 - SSAGA_Mj_Age_1st_Use               |
| 82 - Gambling_Task_Reward_Median_RT_Smaller | 172 - ASR_Attn_T                              | 262 - SSAGA_Mj_Times_Used                |
| 83 - Gambling_Task_Punish_Perc_Larger       | 173 - ASR_Aggr_T                              |                                          |
| 84 - Gambling_Task_Punish_Median_RT_Larger  | 174 - ASR_Rule_T                              |                                          |
| 85 - Gambling_Task_Punish_Perc_Smaller      | 175 - ASR_Intr_T                              |                                          |
| 86 - Gambling_Task_Punish_Median_RT_Smaller | 176 - ASR_Intrn_T                             |                                          |
| 87 - Language_Task_Acc                      | 177 - ASR_Extrn_T                             |                                          |
| 88 - Language_Task_Median_RT                | 178 - ASR_Totp_T                              |                                          |
| 89 - Language_Task_Story_Acc                | 179 - DSM_Depr_T                              |                                          |
| 90 - Language_Task_Story_Median_RT          | 180 - DSM_Anxi_T                              |                                          |

**Fig. S10. List of behavioral variables.** Behavioral variable names are identical to the variable names provided by the HCP data dictionary for the S1200 data release: [HCP\\_S1200\\_DataDictionary\\_April\\_20\\_2018.csv](https://wiki.humanconnectome.org/display/PublicData/HCP-YA+Data+Dictionary+-+Updated+for+the+1200+Subject+Release). Check <https://wiki.humanconnectome.org/display/PublicData/HCP-YA+Data+Dictionary+-+Updated+for+the+1200+Subject+Release> for details.

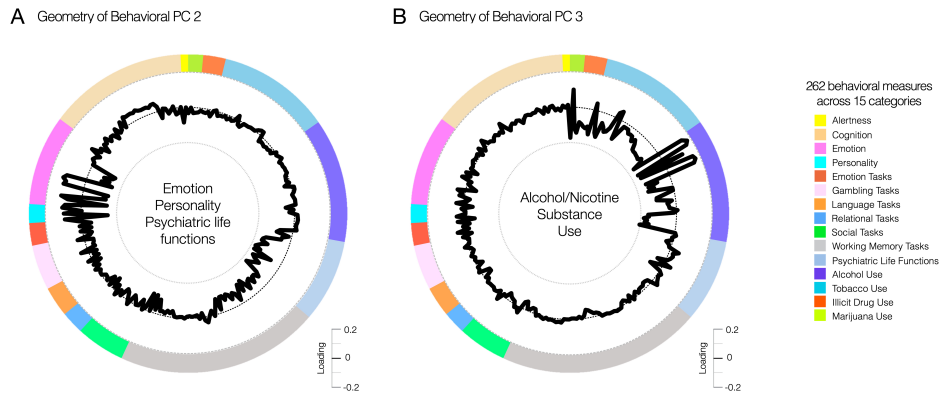

**Fig. S11. The geometry of behavioral PCs 2 and 3. PC 3 has a relationship with sex.**

DRAFT

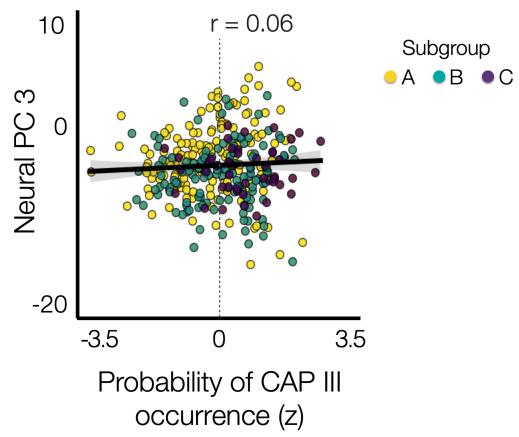

**Fig. S12.** There is no relationship between individual's preference to CAP III and the individual scores on neural PC 3.

DRAFT
